# Supplementary figures and images for: Higher Midazolam Clearance in Obese Adolescents Compared with Morbidly Obese Adults
Source: Springer Nature journal article supplement (doi:10.1007/s40262-017-0579-4), 2017-08-07

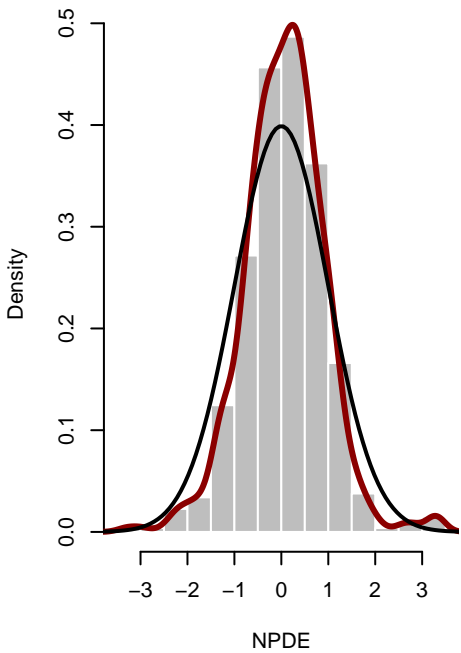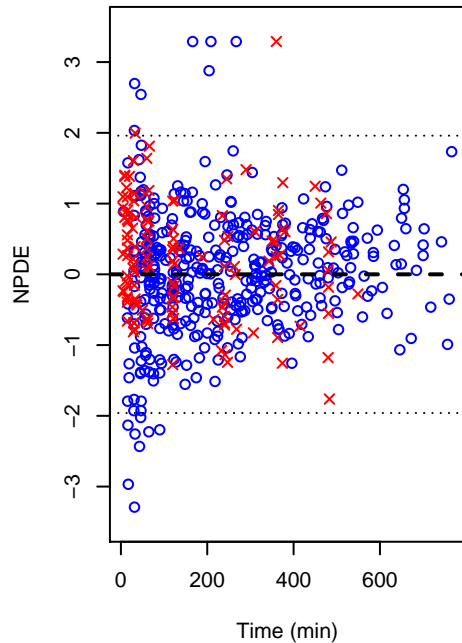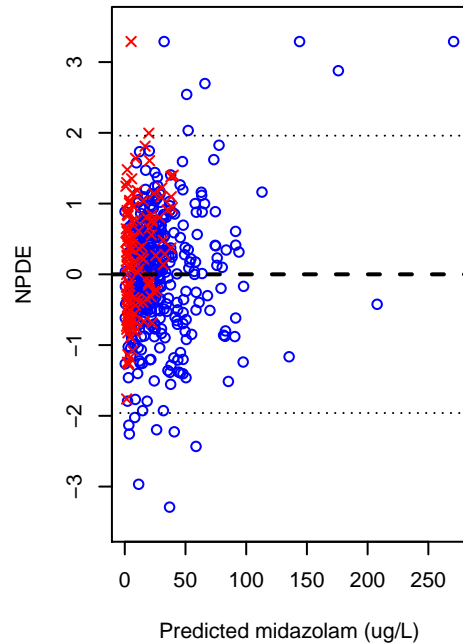

Supplement: MOESM1 [file 13354548]
